# Supplementary material
Source: PubMed Central journal article supplement (PMC2727442)
Supplement: embor200969-s1.pdf [file embor200969-s1.pdf]

**Supplementary Figure 1. Usp19 is a DUB.** Kinetics of cleavage of Ub-AMC by GSTUsp19 $\Delta$ TM and the GST-Usp19mut $\Delta$ TM assayed in the absence or presence of 10 mM NEM.

**Supplementary Figure 2. TM domain predictions.** Raw data of search results for TM domains using the TM-HMM 2.0 algorithm.

**Supplementary Figure 3. Usp19 preferentially stabilizes the core glycosylated Bform**

**of GFP-CFTR $\Delta$ F508.** Western blot analysis of HEK293T cells cotransfected with Myc-Usp19 and GFP-CFTR $\Delta$ F508 as indicated. GFP-CFTRwt was used as a control to identify the core glycosylated immature B-form and the mature C-form of CFTR. GFP was used as transfection control.

# Supplementary Figure 1

A

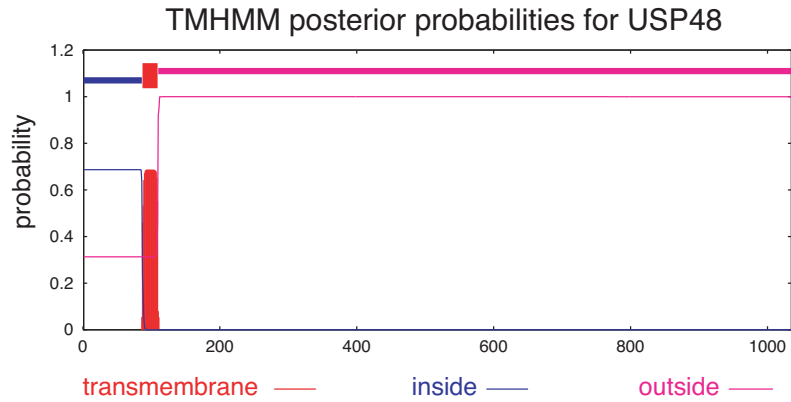

B

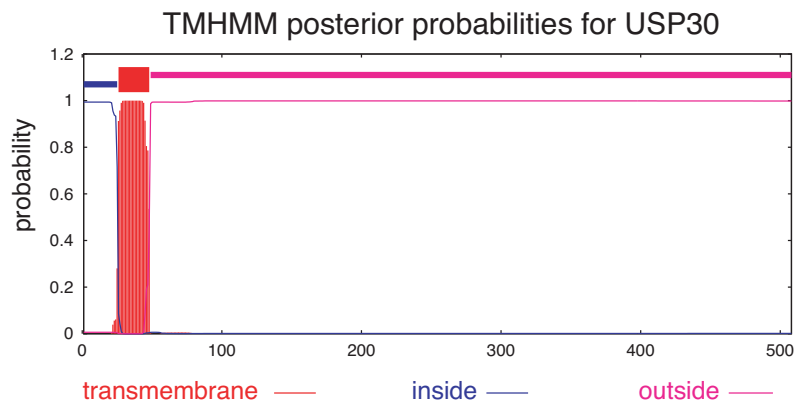

C

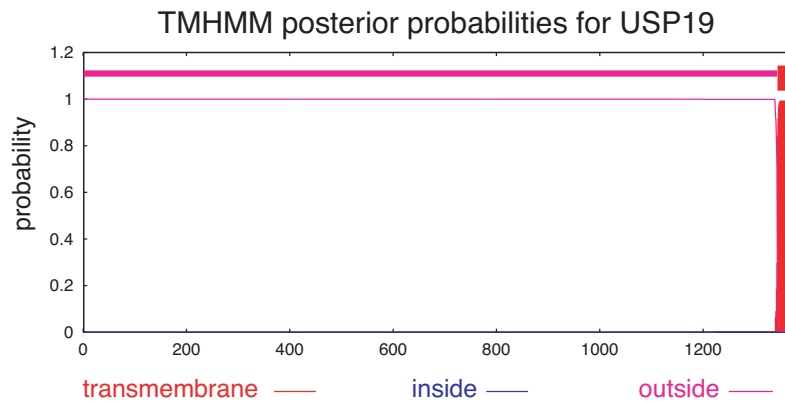

Supplementary  
Figure 2

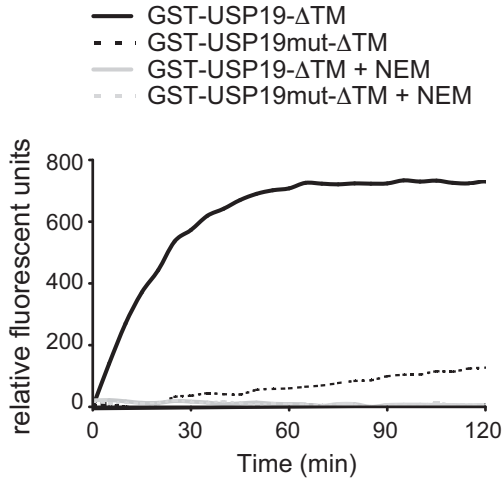

Supplementary  
Figure 3

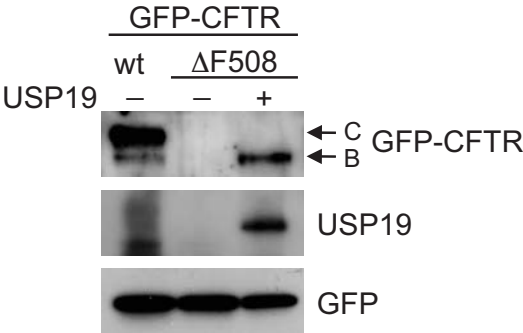

**S1 Table.** List of primers used for cloning of the plasmids described

| source plasmids                                      | primers                                                                                                | target vectors   | Cloned plasmid                                  |
|------------------------------------------------------|--------------------------------------------------------------------------------------------------------|------------------|-------------------------------------------------|
| KIAA0891                                             | 5'-GGTGGAAATTCATGTCTGGCGGGGCCAGTGC-3'<br>5'-GCCCTAGACTTCTCCAGCGACTCTGGGATAC-3'                         | pcDNA4/myc-his-B | pcDNA4 USP19 myc-his                            |
| pcDNA4 USP19 myc-his                                 | 5'-GCTGTTTCATGAACTAGTGTGCCTAAA-3'<br>5'-TTTAGGCAACACTAGTTTCATGAACAGC-3'                                | pcDNA4/myc-his-A | pcDNA4 USP19C506S myc-his                       |
| pcDNA4 USP19 myc-his<br>pcDNA4 USP19C506S<br>myc-his | 5'-GGTGGAAATTCATGTCTGGCGGGGCCAGTGC-3' 5'-<br>CCCTAGACTGAGGCAGCCCTCATCTGGTG-3'                          | pGEX-5X-1        | pGEX-5X-1 USP19wt TM<br>pGEX-5X-1 USP19C506S TM |
| pcDNA4 USP19 myc-his<br>pcDNA4 USP19C506S<br>myc-his | 5'-GGTGGAAATTCATGTCTGGCGGGGCCAGTGC-3'<br>5'-TACCGTCGACTTCTCCAGCGACTCTGGGATAC-3'                        | pEGFP-N2         | pEGFP-N2 USP19wt<br>pEGFP-N2 USP19C506S         |
| pcDNA4 USP19 myc-his                                 | 5'-GGTGGAAATTCATGTCTGGCGGGGCCAGTGC-3'<br>5'-CCCTAGACTGAGGCAGCCCTCATCTGGTG-3'                           | pcDNA4/myc-his-B | pcDNA4 USP19 myc-hist TM                        |
| pYC6-LacZ                                            | 5'-GTTCCATGGCAGTCGACTACCCATACGATGTTCCAGATTA-3'<br>5'-GTTCTGCAGTGACGTAATCATCCCACCTCTGAGACGGAGTACCA-3'   | pACYCDuet1       | pACYC-LacZ                                      |
| pCDNA3-HAub                                          | 5'-GTTCCATGGCAGTCGACTACCCATACGATGTTCCAGATTA-3'<br>5'-GTTCTGCAGTGACGTAATCATCCCACCTCTGAGACGGAGTACCA-3'   | pACYC-LacZ       | pACYC-Ub-LacZ                                   |
| pET3a-Nedd8                                          | 5'-GAACCATGGTAATGCTAATTAAGTGAAGACGCTGAC-3'<br>5'-GAAGTCGACTGACGTTCTCCTCTCAGAGCCAACACCAGGT-3'           | pACYC-LacZ       | pACYC-Nedd8-LacZ                                |
| pCRUZ-HA-Sumo1 and,                                  | 5'-GTTCCATGGCAGTCGACTACCCTTACGACGTTCTGATTA-3'<br>5'-AACTGCAGTGACGTAATCATACCTCCCCTTTGTTCTGATAAACTTCA-3' | pACYC-LacZ       | pACYC-Sumo1-LacZ                                |
| pCRUZ-HA-Sumo3                                       | 5'-GAACCATGGCCGACGAAAAGCCCAAGGAAG-3'<br>5'-GAAGTCGACTGACGTACCTCCCCTGCTGTTGGAACACA-3'                   | pACYC-LacZ       | pACYC-Sumo3-LacZ                                |
| p6His-ISG15                                          | 5'-GAACCATGGGCTGGGACCTGACGGTGAAGA-3'<br>5'-GAAAAGCTTTGACGTAATCATGCCTCCCCGAGGCGCAGATTCA-3'              | pACYC-LacZ       | pACYC-ISG15-LacZ                                |
| HA-FAT10-GG-GFP                                      | 5'-GTTCCATGGCAGAATTCTACCCCTACGACGTGCCCGACTA-3'<br>5'-GAAGTCGACTGACGTCCCTCC AATACAATAAGATGCCAGGAAGA-3'  | pACYC-LacZ       | pACYC-FAT10-LacZ                                |

**S2 Table.** List of primers used for real-time PCR and RT PCR

| name                   | primers                                                  |
|------------------------|----------------------------------------------------------|
| GAPDH control          | 5' AAGGTCGGAGTCAACGGATT 3'<br>5' CTCCTGGAAGATGGTGATGG 3' |
| $\beta$ -actin control | 5'-CCTGGCACCCAGCACAAAT-3'<br>5'-GGGCCGGACTCGTCATACT-3'   |
| USP19 (all isoforms)   | 5'-CGGCACAAGATGAGGAATGA-3'<br>5'-GGCACCGGCAGATAAAGAAA-3' |
| USP19 (TM domain)      | 5''-GTTGTGACGCGTTATGCCTAT 3'<br>5'-TCCAGCTCCTGCCAAATC-3' |
| XBP1                   | 5'-GGGGCTTGGTATATATGTGG-3'<br>5'-CCTTGTAGTTGAGAACCAGG-3' |
